# Supplementary material
Source: bioRxiv or medRxiv preprint supplement (https://www.biorxiv.org/highwire/filestream/72173/field_highwire_adjunct_files/1/236067-2.pdf)

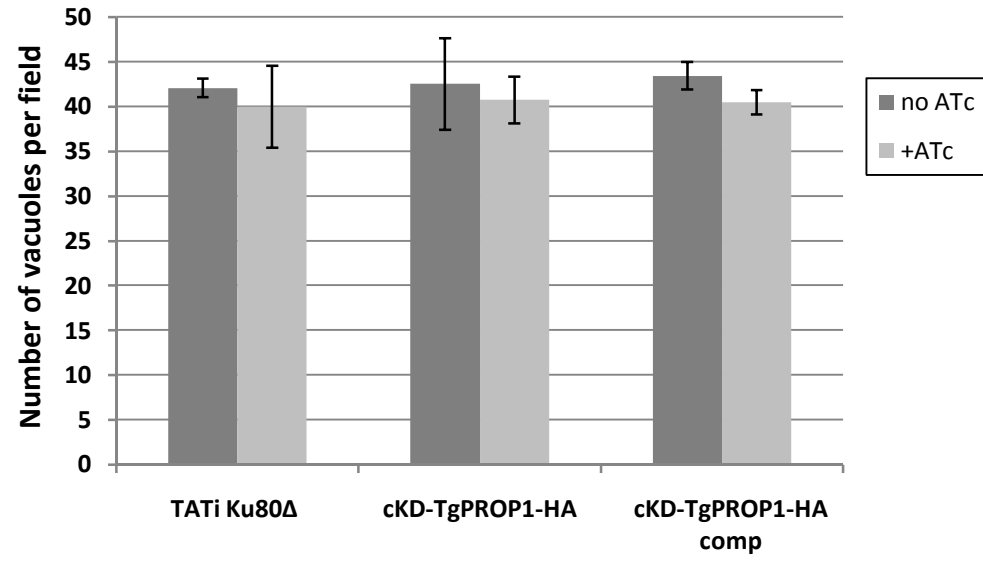

Supplement: Supplementary file [file 236067-2.pdf]
